# Supplementary figures and images for: Bioenergetic Pathways in the Sperm of an Under-Ice Spawning Fish, Burbot (Lota lota): The Role of Mitochondrial Respiration in a Varying Thermal Environment
Source: MDPI journal article supplement (doi:10.3390/biology10080739), 2021-08-01

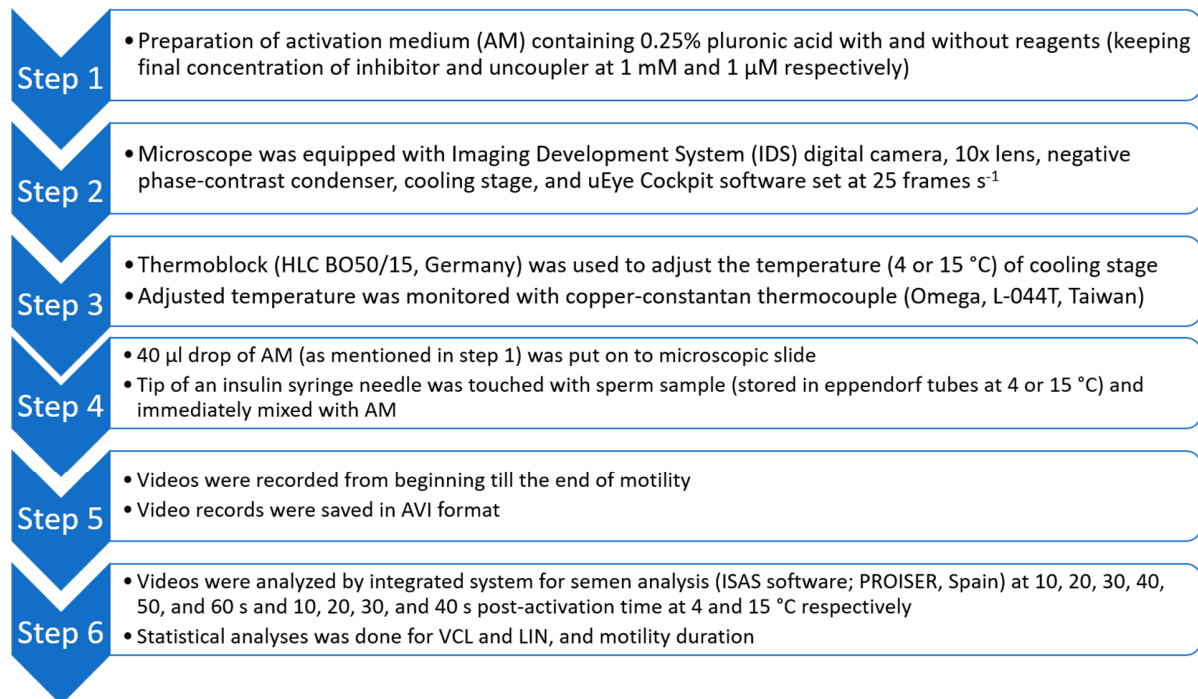

**Figure S1.** Method used for motility assessment

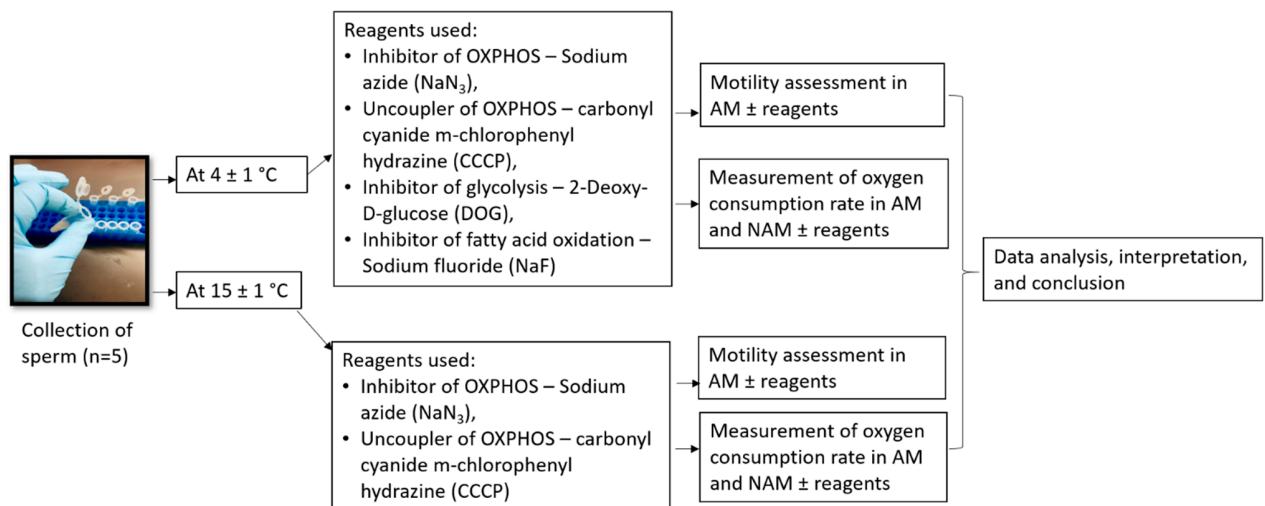

**Figure S2.** General experimental plan

Supplement: s1 [file s1]
